# Supplementary material
Source: Springer Nature journal article supplement (https://www.springermedizin.de/resource/supplementary/12957_2014_1801_MOESM2_ESM.pdf/9563596)

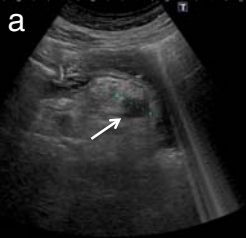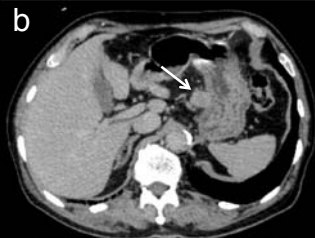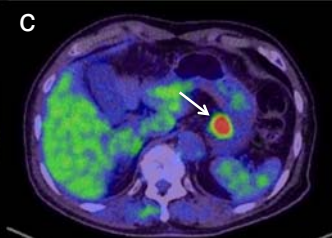

Supplement: MOESM2 [file 9563596]
